# Supplementary material for: Activation of Wnt signaling promotes hippocampal neurogenesis in experimental autoimmune encephalomyelitis
Source: PubMed Central journal article supplement (PMC4969720; doi:10.1186/s13024-016-0117-0), 2016-07-14

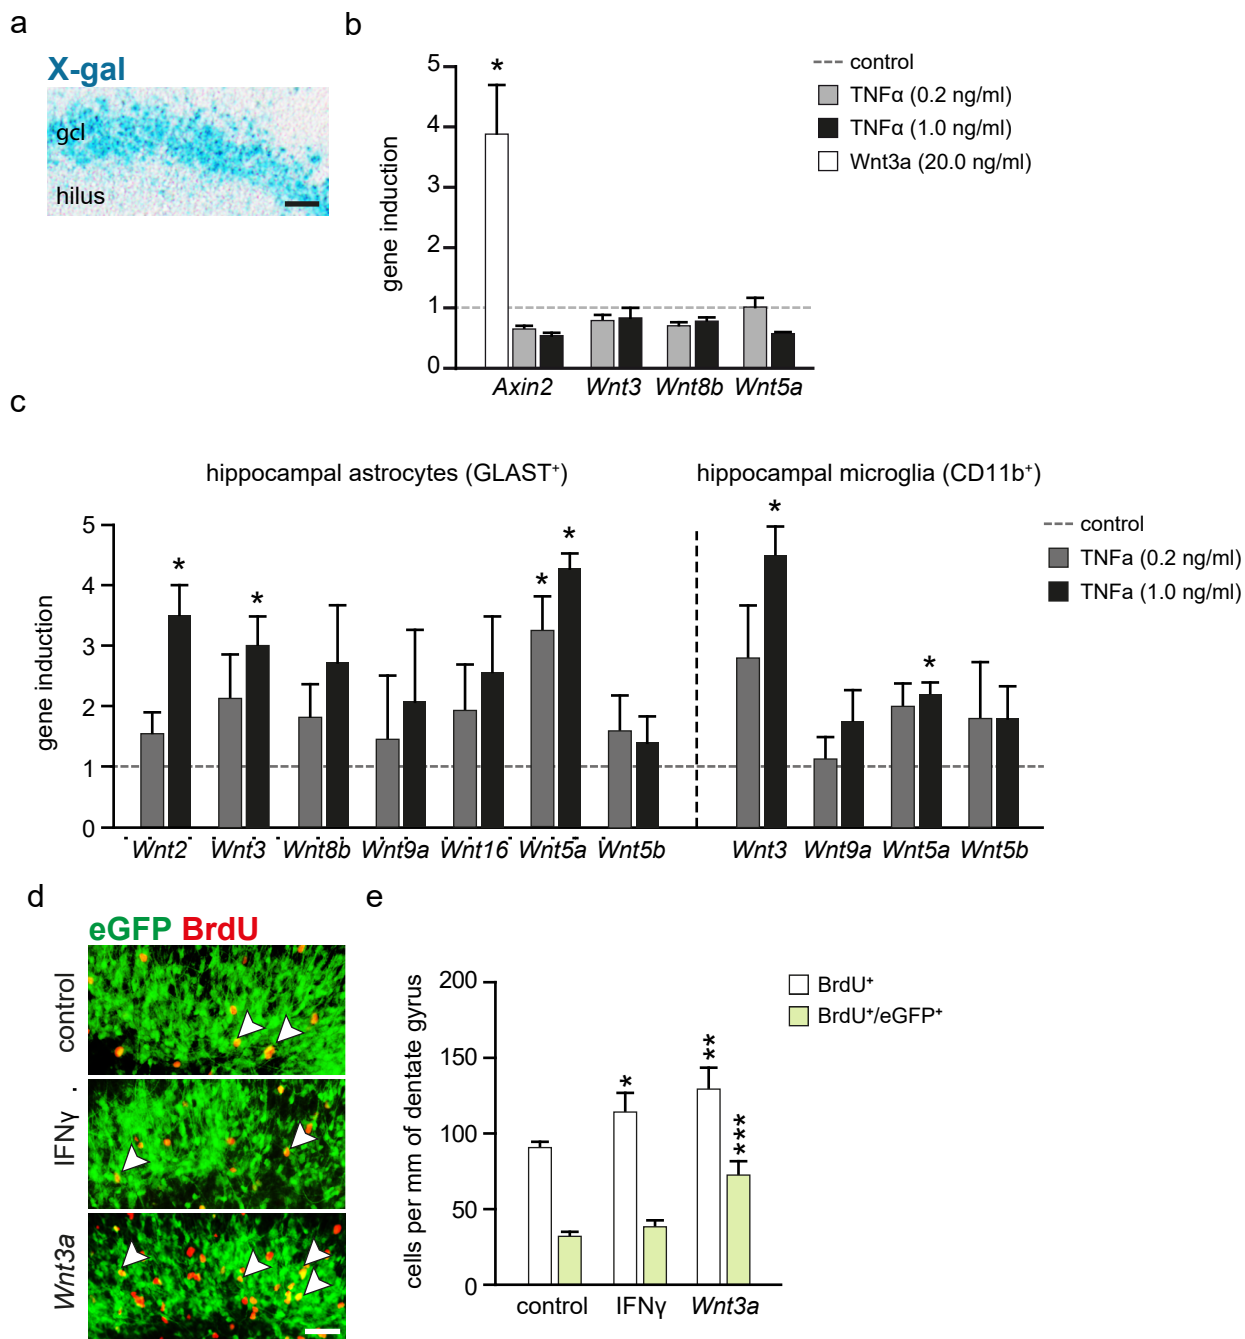

Supplement: 13024_2016_117_MOESM3_ESM.pdf [file 13024_2016_117_MOESM3_ESM.pdf]
